# Supplementary material for: Body Image, Sexuality and Coping in Women Surviving Breast Cancer: A Phenomenological Qualitative Study
Source: MDPI journal article supplement (doi:10.3390/sexes7010009), 2026-02-12
Supplement: s1 [file sexes-4031699-supplementary.pdf › sexes-4031699-supplementary.pdf]

**Table S1. Semi-Structured Interview Guide**

| <b>Domain</b>                                      | <b>Interview questions</b>                                                                                                                                                                                                                                                                           |
|----------------------------------------------------|------------------------------------------------------------------------------------------------------------------------------------------------------------------------------------------------------------------------------------------------------------------------------------------------------|
| <b>Illness trajectory and treatment</b>            | 1. Could you describe your process from diagnosis to the end of treatment?<br>2. What treatments did you receive, and how did you experience each phase?                                                                                                                                             |
| <b>Physical and psychological experience</b>       | 3. How did you feel physically and psychologically during treatment and after completing it?<br>4. What symptoms or sequelae have persisted since treatment ended?                                                                                                                                   |
| <b>Lived body and body image</b>                   | 5. What bodily changes did you experience as a result of breast cancer and its treatments?<br>6. How have these bodily changes affected how you see yourself and relate to your body?<br>7. Have these changes influenced your sense of identity or femininity in any way?                           |
| <b>Sexuality and intimacy</b>                      | 8. How did your sexual life and intimacy evolve during treatment and after treatment?<br>9. What difficulties or changes did you notice in sexual desire, comfort, or satisfaction?<br>10. Did you receive any professional support or information related to sexuality? What would you have needed? |
| <b>Partner relationship and relational context</b> | 11. What was your relationship situation at the time of diagnosis and treatment?<br>12. If you had a partner, how did the illness affect your relationship and communication?<br>13. If you did not have a stable partner, did your sexual life or the way you related to others change?             |
| <b>Daily life and occupational participation</b>   | 14. What changes did you experience in your day-to-day life after the illness (self-care, household tasks, work, leisure, social participation)?<br>15. Were there activities you stopped doing or had to adapt? How did you manage these changes?                                                   |
| <b>Coping, support, and meaning-making</b>         | 16. What helped you cope emotionally with the illness and its consequences?<br>17. What sources of support were most important for you (family, friends, peer groups, associations)?<br>18. Looking back, what meaning does this experience have for you today?                                      |
| <b>Closing</b>                                     | 19. Is there anything important you would like to add that we have not discussed?                                                                                                                                                                                                                    |
